# Supplementary material for: New insights into the evolution and functional divergence of the CIPK gene family in Saccharum
Source: PubMed Central journal article supplement (PMC7720545; doi:10.1186/s12864-020-07264-9), 2020-12-07
Supplement: 12864_2020_7264_MOESM1_ESM.pdf [file 12864_2020_7264_MOESM1_ESM.pdf]

# **New insights into the evolution and functional divergence of the *CIPK* gene family in *Saccharum***

Weihua Su<sup>1,2</sup>, Yongjuan Ren<sup>1,2</sup>, Dongjiao Wang<sup>1,2</sup>, Long Huang<sup>1,2</sup>, Xueqin Fu<sup>3</sup>, Hui Ling<sup>1</sup>, Yachun Su<sup>1,2</sup>, Ning Huang<sup>1,2</sup>, Hanchen Tang<sup>1,2</sup>, Liping Xu<sup>1,2</sup>, Youxiong Que<sup>1,2\*</sup>

<sup>1</sup>Key Laboratory of Sugarcane Biology and Genetic Breeding, Ministry of Agriculture, Fujian Agriculture and Forestry University, Fuzhou 350002, China

<sup>2</sup>Key Laboratory of Genetics, Breeding and Multiple Utilization of Crops, Ministry of Education, Fujian Agriculture and Forestry University, Fuzhou 350002, China

<sup>3</sup> Key Laboratory of Ministry of Education for Genetics, Breeding and Multiple Utilization of Crops, Plant Immunity Center, Fujian Agriculture and Forestry University, Fuzhou 350002, China.

**\*Correspondence should be addressed to [queyouxiong@126.com](mailto:queyouxiong@126.com)**

**The full postal address of the submitting author Youxiong Que is as follows:** Key Laboratory of Sugarcane Biology and Genetic Breeding, Ministry of Agriculture, Fujian Agriculture and Forestry University, Fuzhou 350002, China



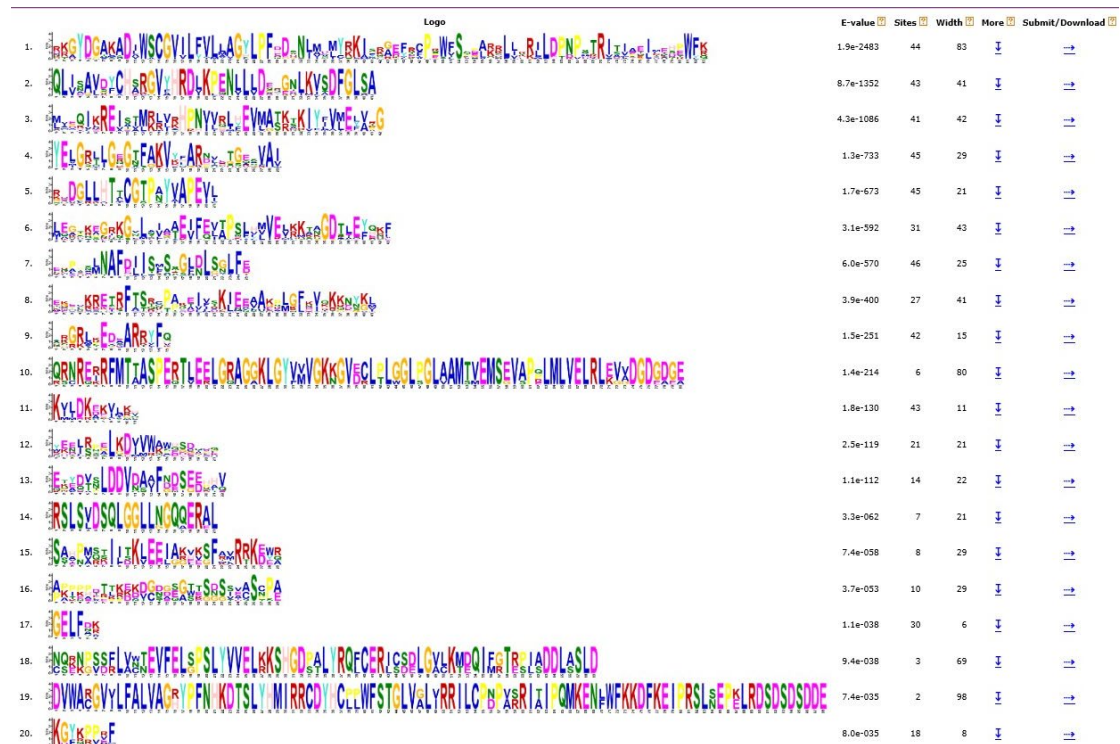

**Fig. S2** Analysis and distribution of conserved motifs in SsCIPK proteins.

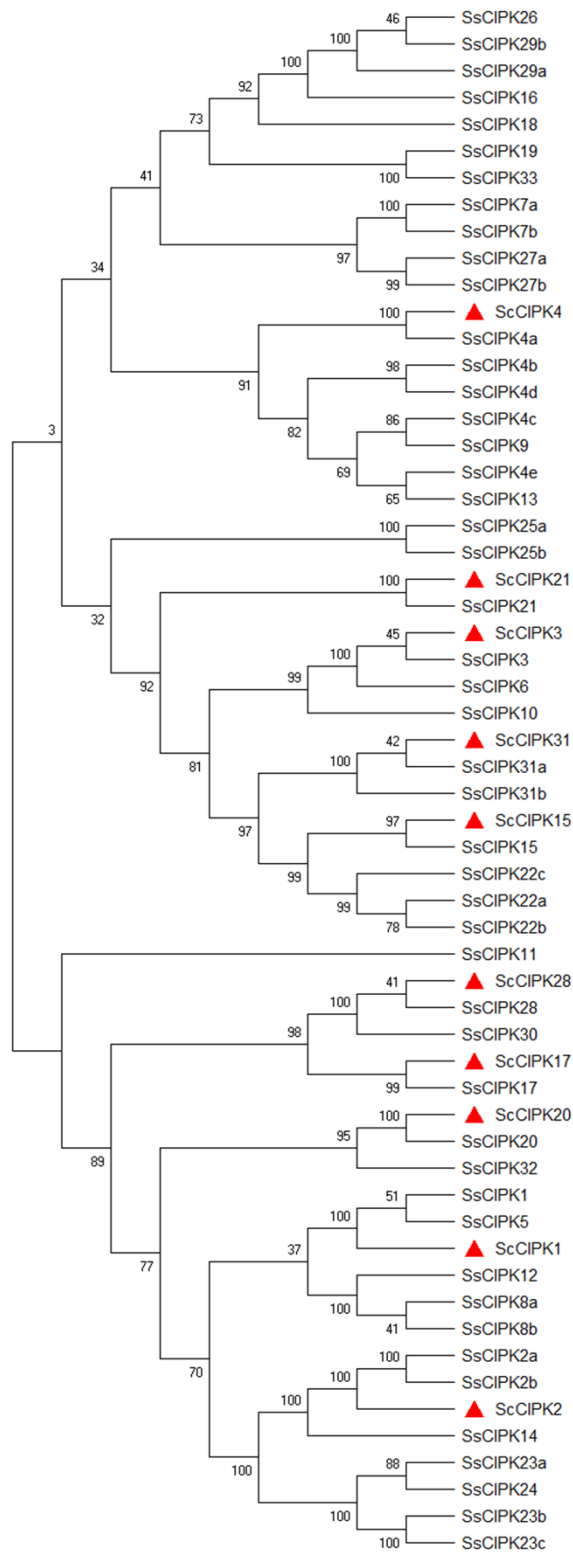

**Fig. S3** Phylogenetic analysis of CIPK proteins from *S. spontaneum* and *Saccharum* spp. hybrid (ROC22). Red triangles represent ScCIPK proteins.

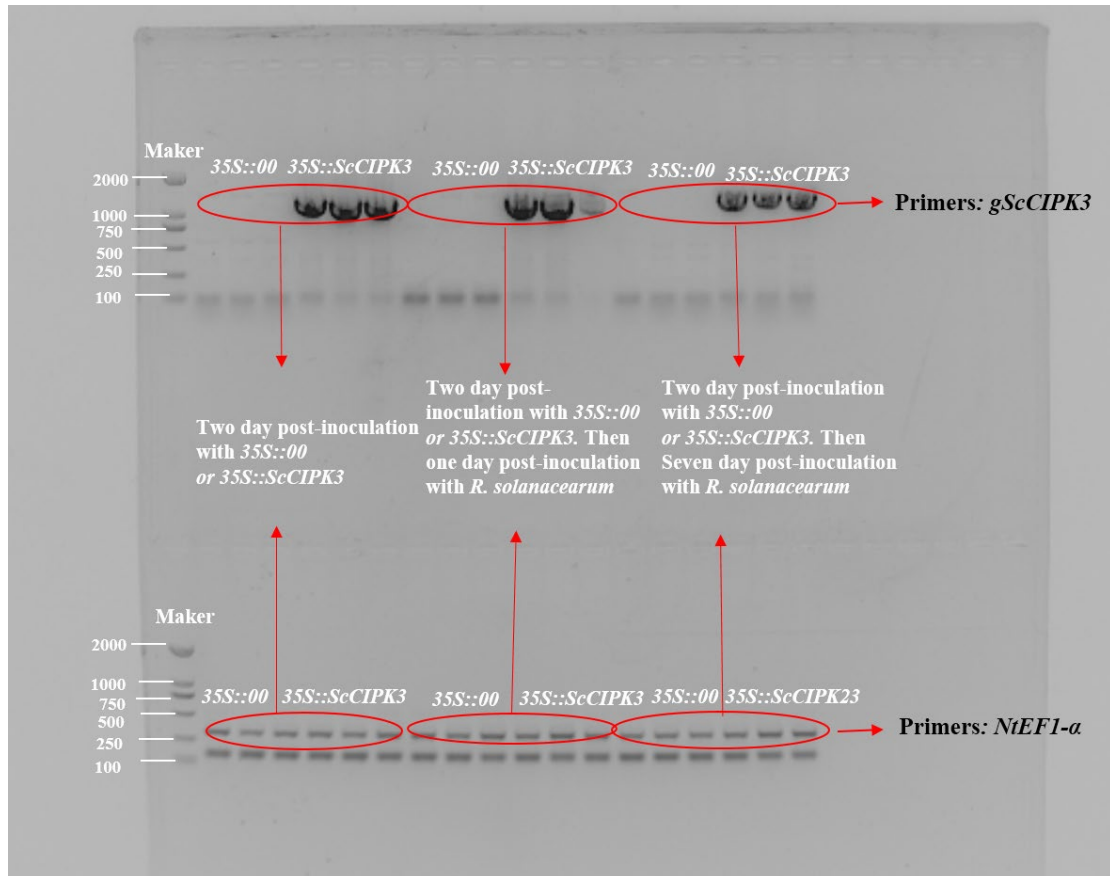

**Fig. S4** RT-PCR analysis of *ScCIPK3* in the *N. benthamiana* leaves 2 days after infiltration with *Agrobacterium* strain GV3101 that carried the vector 35S::00 or 35S::ScCIPK3, in the *ScCIPK3* transiently expressed *N. benthamiana* challenged by *R. solanacearum* for one day, and in the *ScCIPK3* transiently expressed *N. benthamiana* challenged by *R. solanacearum* for seven days.

Note: 35S::00 stands for the control templet, 35S::ScCIPK3 stands for the templet of instantaneous expression *ScCIPK3*. *gScCIPK3* and *NtEF1-α* represented the primers used in the RT-PCR.

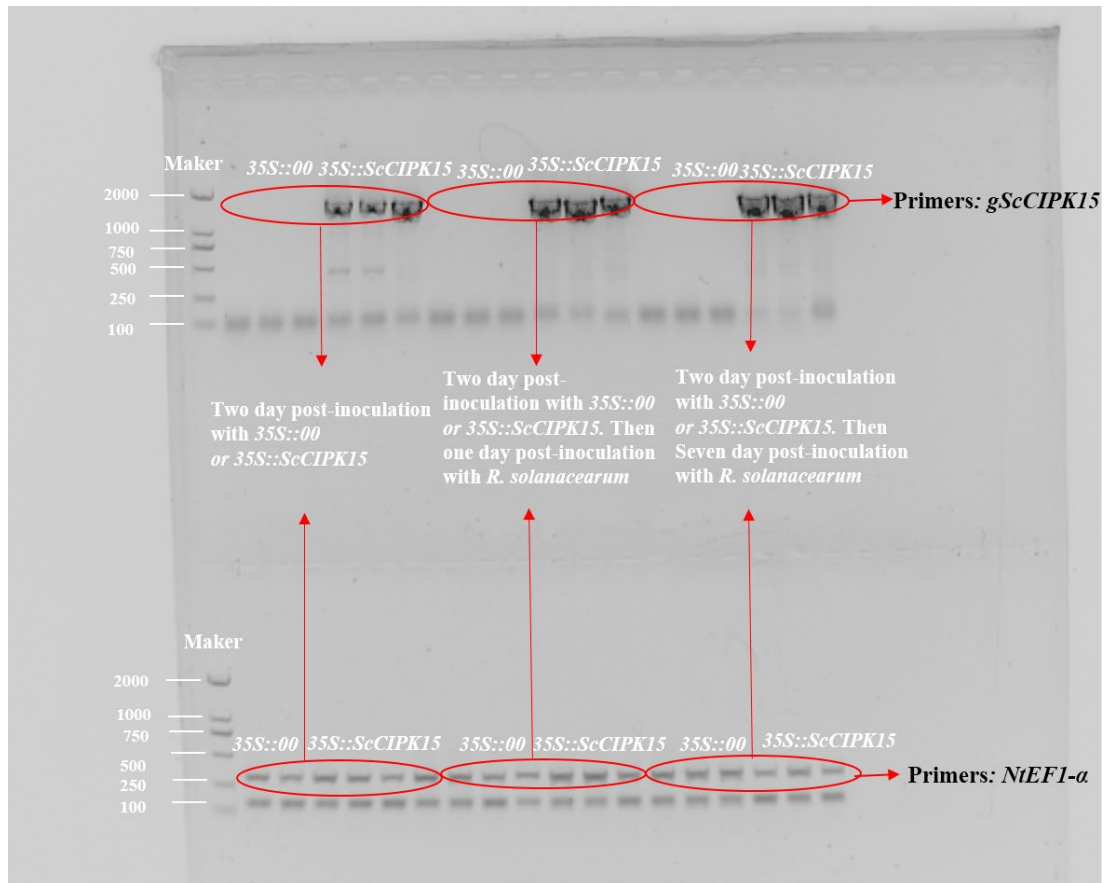

**Fig. S5** RT-PCR analysis of *ScCIPK15* in the *N. benthamiana* leaves 2 days after infiltration with *Agrobacterium* strain GV3101 that carried the vector 35S::00 or 35S::ScCIPK15, in the *ScCIPK15* transiently expressed *N. benthamiana* challenged by *R. solanacearum* for one day, and in the *ScCIPK15* transiently expressed *N. benthamiana* challenged by *R. solanacearum* for seven days. Note: 35S::00 stands for the control templet, 35S::ScCIPK15 stands for the templet of instantaneous expression *ScCIPK15*. gScCIPK15 and NtEF1-α represented the primers used in the RT-PCR.

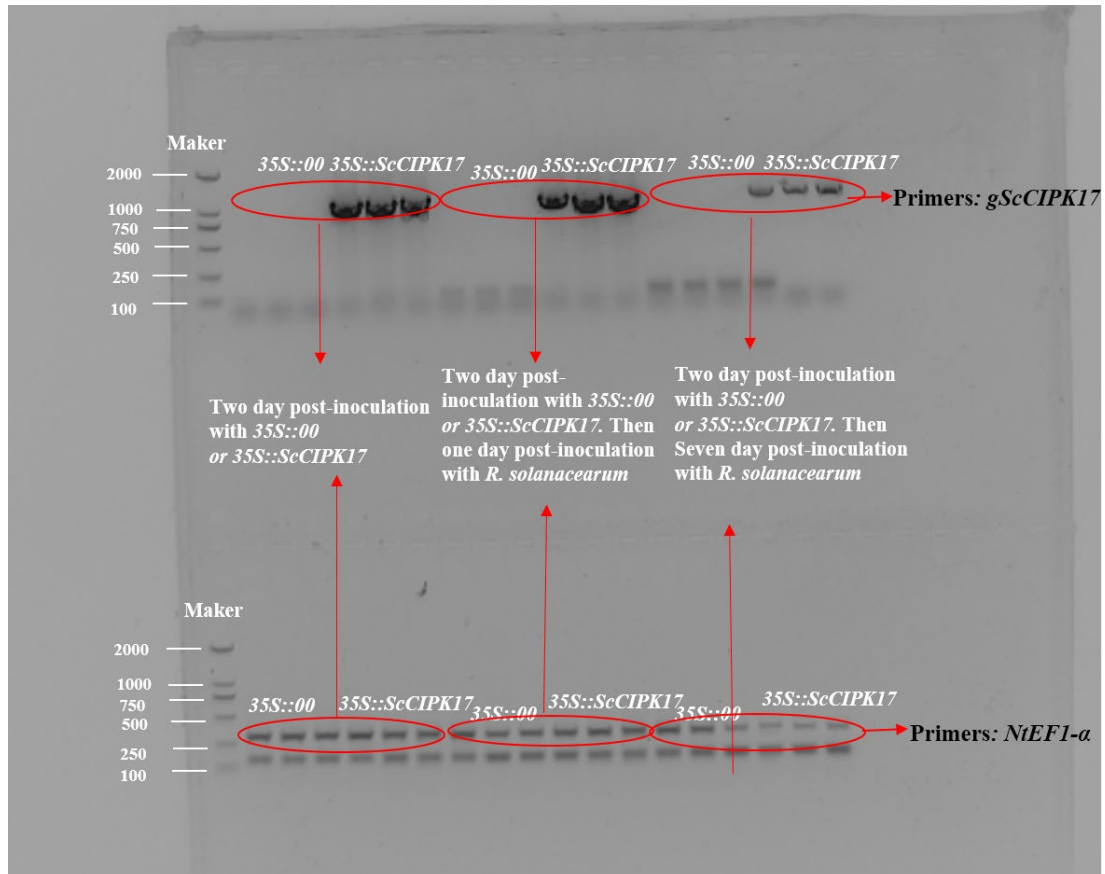

**Fig. S6** RT-PCR analysis of *ScCIPK17* in the *N. benthamiana* leaves 2 days after infiltration with *Agrobacterium* strain GV3101 that carried the vector 35S::00 or 35S::*ScCIPK17*, in the *ScCIPK17* transiently expressed *N. benthamiana* challenged by *R. solanacearum* for one day, and in the *ScCIPK17* transiently expressed *N. benthamiana* challenged by *R. solanacearum* for seven days. Note: 35S::00 stands for the control templet, 35S::*ScCIPK17* stands for the templet of instantaneous expression *ScCIPK17*. *gScCIPK17* and *NtEF1-α* represented the primers used in the RT-PCR.

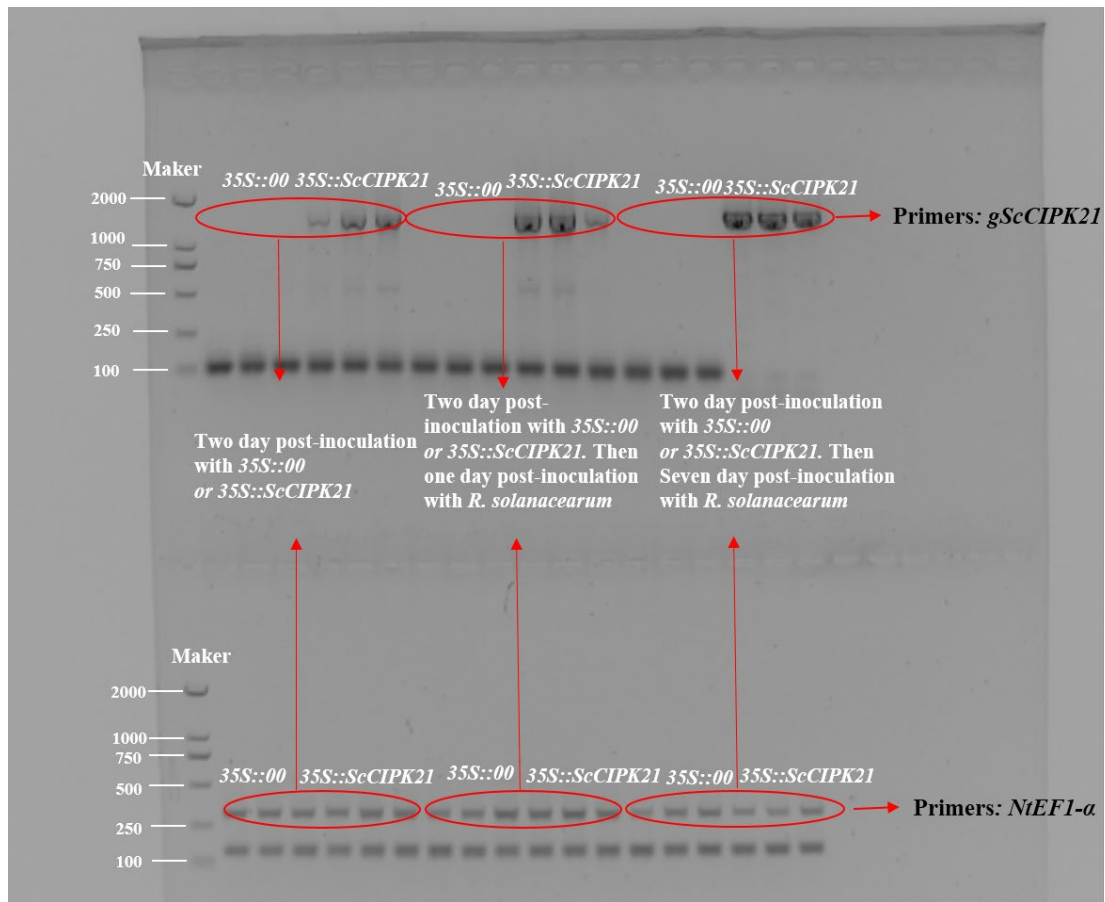

**Fig. S7** RT-PCR analysis of *ScCIPK21* in the *N. benthamiana* leaves 2 days after infiltration with *Agrobacterium* strain GV3101 that carried the vector *35S::00* or *35S::ScCIPKs*, in the *ScCIPK21* transiently expressed *N. benthamiana* challenged by *R. solanacearum* for one day, and in the *ScCIPK21* transiently expressed *N. benthamiana* challenged by *R. solanacearum* for seven days. Note: *35S::00* stands for the control templet, *35S::ScCIPK21* stands for the templet of instantaneous expression *ScCIPK21*. *gScCIPK21* and *NtEF1-α* represented the primers used in the RT-PCR.
