# Supplementary material for: New insights into the evolution and functional divergence of the CIPK gene family in Saccharum
Source: PubMed Central journal article supplement (PMC7720545; doi:10.1186/s12864-020-07264-9), 2020-12-07
Supplement: 12864_2020_7264_MOESM6_ESM.pdf [file 12864_2020_7264_MOESM6_ESM.pdf]

**Table S5** Primers used in this study

| <b>Primer</b>    | <b>Forward primer (5'-3')</b>                                  | <b>Reverse primer (5'-3')</b>                                 | <b>Strategy</b>                                                  |
|------------------|----------------------------------------------------------------|---------------------------------------------------------------|------------------------------------------------------------------|
| <i>ScCIPK1</i>   | AAACCCTTGCCTGTCCGTTCTTCG                                       | AGGCATCTCACCTGTGGCAACCAA                                      | Gene cloning                                                     |
| <i>ScCIPK2</i>   | CTCGTTTCTCCTTGAGCTCTT                                          | AACCGACTCTGCAATGGACA                                          | Gene cloning                                                     |
| <i>ScCIPK3</i>   | CCTTGCTTGGGAATTGGCAG                                           | CAGCGTTACACTTGTCACAATATC                                      | Gene cloning                                                     |
| <i>ScCIPK4</i>   | CAAGCCCAGCCCCTGTAAACCACCA                                      | GCAAGAGGAAATGCGATCGAGCAGGAT                                   | Gene cloning                                                     |
| <i>ScCIPK15</i>  | TCACCTTGGAGACGACG                                              | ACTGCAGAAATGCCATGTATTCCAG                                     | Gene cloning                                                     |
| <i>ScCIPK17</i>  | CACGACCTCTGTCCGCAAT                                            | GTGGCTAATTTCCACCGCTC                                          | Gene cloning                                                     |
| <i>ScCIPK20</i>  | AGGCTTGCTCTTCCCAGAAATCTCCT                                     | ACTTTGCACAGGGAATCGAGGTACGG                                    | Gene cloning                                                     |
| <i>ScCIPK21</i>  | CGCTCGTGAACCATTGTAGC                                           | CGCAATTACAGTCCACCCTCT                                         | Gene cloning                                                     |
| <i>ScCIPK28</i>  | TCCCTGCCCTGTATTCCAACCGTCT                                      | TGCGTTGCAGCTGAACTGCTTTGGT                                     | Gene cloning                                                     |
| <i>ScCIPK31</i>  | GCATCAATTCCACGCCGTTT                                           | CACCACCATGGTCTCCAATAC                                         | Gene cloning                                                     |
| <i>qScCIPK1</i>  | TAGACCACCTCTTCGGGTGATA                                         | TTGACATCCCATTGCAGTGTTT                                        | qRT-PCR analysis                                                 |
| <i>qScCIPK2</i>  | CGCTTGGCTTTGATGTTTCA                                           | ACAACATCCTTCAGTTGGGTTG                                        | qRT-PCR analysis                                                 |
| <i>qScCIPK3</i>  | CGCTCCTTACCCATCTTTACC                                          | GTTTGGGTATCTGCCAATTCC                                         | qRT-PCR analysis                                                 |
| <i>qScCIPK4</i>  | TGTAAACCACCAAGCCAAAGAG                                         | GAGCTCATACTTGCCGAGGAG                                         | qRT-PCR analysis                                                 |
| <i>qScCIPK15</i> | GCAGTACGTCTGAGGGAAATCA                                         | TTAAGCGTTTGGAGAGCTCCTT                                        | qRT-PCR analysis                                                 |
| <i>qScCIPK17</i> | CTCCCAGGAATCCGTCATCATT                                         | CGCTCAGTGATTAGTCCCTCAT                                        | qRT-PCR analysis                                                 |
| <i>qScCIPK20</i> | AACTACAAAAGAGCAGCAGGAGA                                        | ACCCACTCATCAAGTCCATAGT                                        | qRT-PCR analysis                                                 |
| <i>qScCIPK21</i> | AAGGATGTTTAGGTTGCCTTCA                                         | GTCATGAACCGTGAGTTGCTG                                         | qRT-PCR analysis                                                 |
| <i>qScCIPK28</i> | CCCATGGTGATCCTGCATTGTA                                         | AAAGGCGTCGCAGATCGTTT                                          | qRT-PCR analysis                                                 |
| <i>qScCIPK31</i> | CCCAACTTGATGGAGATGTATCG                                        | CTCCTTTACTGTACGGGTCTCC                                        | qRT-PCR analysis                                                 |
| <i>CAC</i>       | ACAACGTCAGGCAAAGCAA                                            | AGATCAACTCCACCTCTGCG-3                                        | qRT-PCR analysis                                                 |
| <i>CUL</i>       | TGCTGAATGTGTTGAGCAGC                                           | TTGTGCGCTCCAAGTAGTC                                           | qRT-PCR analysis                                                 |
| <i>gScCIPK3</i>  | <u>GGGGACAAGTTTGTACAAAAAAGCAGGCTTC</u><br>ATGATTGAGAAAGAGAATAT | <u>GGGGACCACTTTGTACAAGAAAGCTGGGTCT</u><br>TCACCTAGCCAAGCCCACA | Gateway entry vector construction and semi-quantitative analysis |
| <i>gScCIPK15</i> | <u>GGGGACAAGTTTGTACAAAAAAGCAGGCTTC</u><br>ATGGATGGTAGGAGGACAAT | <u>GGGGACCACTTTGTACAAGAAAGCTGGGTCTG</u><br>TTGTTTTGTTCTCTGGAG | Gateway entry vector construction and semi-quantitative analysis |
| <i>gScCIPK17</i> | <u>GGGGACAAGTTTGTACAAAAAAGCAGGCTTC</u><br>ATGGTGCTTGAGTTTGTAA  | <u>GGGGACCACTTTGTACAAGAAAGCTGGGTCTG</u><br>AACCAGATAGAGGGAACG | Gateway entry vector construction and semi-quantitative analysis |

---

|                       |                                                               |                                                               |                                                                     |
|-----------------------|---------------------------------------------------------------|---------------------------------------------------------------|---------------------------------------------------------------------|
| <i>gScCIPK21</i>      | <u>GGGACAAGTTTGTACAAAAAAGCAGGCTTC</u><br>ATGGAGAAGAAGCCGACCAT | <u>GGGACCACCTTTGTACAAGAAAGCTGGGTCA</u><br>GAGGATGGCTTCAATGGTG | Gateway entry vector construction and<br>semi-quantitative analysis |
| <i>NtHSR201</i>       | CAGCAGTCCTTTGGCGTTGTC                                         | GCTCAGTTTAGCCGCAGTTGTG                                        | qRT-PCR analysis                                                    |
| <i>NtHSR203</i>       | TGGCTCAACGATTACGCA                                            | GCACGAAACCTGGATGG                                             | qRT-PCR analysis                                                    |
| <i>NtHSR515</i>       | TTGGGCAGAATAGATGGGTA                                          | TTTGGTGAAAGTCTTGGCTC                                          | qRT-PCR analysis                                                    |
| <i>NtPR-1a/c</i>      | AACCTTTGACCTGGGACGAC                                          | GCACATCCAACACGAACCGA                                          | qRT-PCR analysis                                                    |
| <i>NtPR2</i>          | TGATGCCCTTTTGATTCTATG                                         | AGTTCCTGCCCCGCTTT                                             | qRT-PCR analysis                                                    |
| <i>NtPR3</i>          | CAGGAGGGTATTGCTTTGTTAGG                                       | CGTGGGAAGATGGCTTGTGTC                                         | qRT-PCR analysis                                                    |
| <i>NtEFE26</i>        | CGGACGCTGGTGGCATAAT                                           | CAACAAGAGCTGGTGCTGGATA                                        | qRT-PCR analysis                                                    |
| <i>NtAccdeaminase</i> | TCTGAGGTTACTGATTTGGATTGG                                      | TGGACATGGTGGATAGTTGCT                                         | qRT-PCR analysis                                                    |
| <i>NtEF1-α</i>        | TGCTGCTGTAACAAGATGGATGC                                       | GAGATGGGGACAAAGGGGATT                                         | qRT-PCR analysis                                                    |

---

Note: attB1 and attB2 adapters were underlined in the primer *gScCIPKs*.
