# Supplementary material for: New insights into the evolution and functional divergence of the CIPK gene family in Saccharum
Source: PubMed Central journal article supplement (PMC7720545; doi:10.1186/s12864-020-07264-9), 2020-12-07
Supplement: 12864_2020_7264_MOESM7_ESM.pdf [file 12864_2020_7264_MOESM7_ESM.pdf]

**Table S6** The amplification reaction procedures for cloning of sugarcane *ScCIPKs*

| <b>Gene name</b> | <b>Pre-denaturation</b> | <b>Denaturation</b> | <b>Annealing</b> | <b>Extension</b> | <b>Cycles</b> | <b>Extension</b> | <b>Enzyme</b> |
|------------------|-------------------------|---------------------|------------------|------------------|---------------|------------------|---------------|
| <i>ScCIPK1</i>   | 94°C 1 min              | 98°C 10 s           | -                | 68°C 2 min       | 30            | 72°C 10 min      | <i>LA</i> Taq |
| <i>ScCIPK2</i>   | 94°C 4 min              | 94°C 30 s           | 55°C 30 s        | 72°C 2 min       | 35            | 72°C 10 min      | <i>Ex</i> Taq |
| <i>ScCIPK3</i>   | 94°C 4 min              | 94°C 30 s           | 55°C 30 s        | 72°C 2 min       | 35            | 72°C 10 min      | <i>Ex</i> Taq |
| <i>ScCIPK4</i>   | 94°C 1 min              | 98°C 10 s           | -                | 68°C 2 min       | 30            | 72°C 10 min      | <i>LA</i> Taq |
| <i>ScCIPK15</i>  | 94°C 4 min              | 94°C 30 s           | 50°C 30 s        | 72°C 2 min       | 35            | 72°C 10 min      | <i>Ex</i> Taq |
| <i>ScCIPK17</i>  | 94°C 4 min              | 94°C 30 s           | 50°C 30 s        | 72°C 2 min       | 35            | 72°C 10 min      | <i>Ex</i> Taq |
| <i>ScCIPK20</i>  | 94°C 1 min              | 98°C 10 s           | -                | 68°C 2 min       | 30            | 72°C 10 min      | <i>LA</i> Taq |
| <i>ScCIPK21</i>  | 94°C 4 min              | 94°C 30 s           | 55°C 30 s        | 72°C 2 min       | 35            | 72°C 10 min      | <i>Ex</i> Taq |
| <i>ScCIPK28</i>  | 94°C 4 min              | 94°C 30 s           | 45°C 30 s        | 72°C 2 min       | 35            | 72°C 10 min      | <i>Ex</i> Taq |
| <i>ScCIPK31</i>  | 94°C 4 min              | 94°C 30 s           | 50°C 30 s        | 72°C 2 min       | 35            | 72°C 10 min      | <i>Ex</i> Taq |
